# Supplementary material for: Attrition of Patients on a Precision Oncology Trial: Analysis of the I‐PREDICT Experience
Source: PubMed Central journal article supplement — Oncologist. 2020 Oct 2;25(11):e1803–6. doi: 10.1002/onco.13532 (PMC7648352; doi:10.1002/onco.13532), 2020-10-02
Supplement: ONCO-25-e1803-s002.pdf [file ONCO-25-e1803-s002.pdf]

Supplemental Table for:  
Attrition of Patients on a Precision Oncology Trial: Analysis of the I-PREDICT Experience  
Sandy Bohan et al.

**Supplemental Table 1.** Tumor Types of Consented Patients in the I-PREDICT Trial (University of California San Diego site)

| Parameter                                            | Evaluable | Inevaluable | Awaiting Treatment |
|------------------------------------------------------|-----------|-------------|--------------------|
| Consented, <i>N</i> = 190                            | 99 (52%)  | 83 (44%)    | 8 (4%)             |
| Tumor type                                           |           |             |                    |
| Blood, <i>n</i> = 3 (1%)                             | 1 (33%)   | 2 (67%)     | 0                  |
| Breast, <i>n</i> = 5 (3%)                            | 4 (80%)   | 1 (20%)     | 0                  |
| Central Nervous System, <i>n</i> = 7 (4%)            | 5 (71%)   | 2 (29%)     | 0                  |
| Endocrine, Neuroendocrine, <i>n</i> = 6 (3%)         | 3 (50%)   | 2 (33%)     | 1 (17%)            |
| Gastrointestinal <sup>a</sup> , <i>n</i> = 103 (54%) | 50 (49%)  | 49 (47%)    | 4 (4%)             |
| Genitourinary, <i>n</i> = 5 (3%)                     | 3 (60%)   | 2 (40%)     | 0                  |
| Gynecological, <i>n</i> = 27 (14%)                   | 13 (48%)  | 12 (45%)    | 2 (7%)             |
| Lung, <i>n</i> = 3 (1%)                              | 2 (67%)   | 1 (33%)     | 0                  |
| Mesothelioma, <i>n</i> = 2 (1%)                      | 0         | 2 (100%)    | 0                  |
| Oral, Head, and Neck; <i>n</i> = 10 (5%)             | 6 (60%)   | 3 (30%)     | 1 (10%)            |
| Soft Tissue Sarcoma, <i>n</i> = 18 (10%)             | 11 (61%)  | 7 (39%)     | 0                  |
| Unspecified site, <i>n</i> = 1 (1%)                  | 1 (100%)  | 0           | 0                  |

Note: Data for evaluable, inevaluable, and awaiting treatment are presented as *n* (%) of the tumor type.

<sup>a</sup>Gastrointestinal tumor type includes hepatobiliary (16%, *n* = 16 of 103 patients) and pancreatic cancers (12%, *n* = 12 of 103 patients).
